# Supplementary material for: Particle-based photodynamic therapy based on indocyanine green modified plasmonic nanostructures for inactivation of a Crohn's disease-associated Escherichia coli strain
Source: Royal Society of Chemistry journal article supplement (doi:10.1039/c5tb02697k), 2016-01-01
Supplement: c5tb02697k1.pdf [file c5tb02697k1.pdf]

## SUPPORTING INFORMATION

### **Particle-based photodynamic therapy based on Indocyanine green modified plasmonic nanostructures for inactivation of Crohn's disease-associated *Escherichia coli***

Roxana Jijie,<sup>1,2</sup> Tetiana Dumych,<sup>3</sup> Li Chengnang,<sup>1</sup> Julie Boukaert,<sup>3</sup> Kostiantyn Turcheniuk,<sup>1</sup> Charles-Henri Hage,<sup>4</sup> Laurent Heliot,<sup>4</sup> Benoit Cudennec,<sup>5</sup> Nicoleta Dumitrascu,<sup>2</sup> Rabah Boukherroub<sup>1</sup> and Sabine Szunerits<sup>1\*</sup>

<sup>1</sup>*Institut d'Electronique, de Microélectronique et de Nanotechnologie (IEMN), UMR CNRS8520, Université Lille1, Avenue Poincaré-BP 60069, 59652 Villeneuve d'Ascq, France*

<sup>2</sup>*Iasi Plasma Advanced Research Center (IPARC), Faculty of Physics, Alexandru Ioan Cuza University of Iasi, Bd. Carol I No. 11, Iasi 700506, Romania*

<sup>3</sup>*Unité de Glycobiologie Structurale et Fonctionnelle (UGSF), Université Lille 1, CNRS UMR 8576, 59655 Villeneuve d'Ascq, France*

<sup>4</sup>*Laboratoire de physique des Maser, Atomes et Molécules (PhLAM), Université Lille 1, CNRS UMR 8523, 59655 Villeneuve d'Ascq, France*

<sup>5</sup>*Institut Charles Viollette, ProBioGEM, Polytech'Lille, Université Lille 1, Avenue Paul Langevin, 59655 Villeneuve d'Ascq, France*

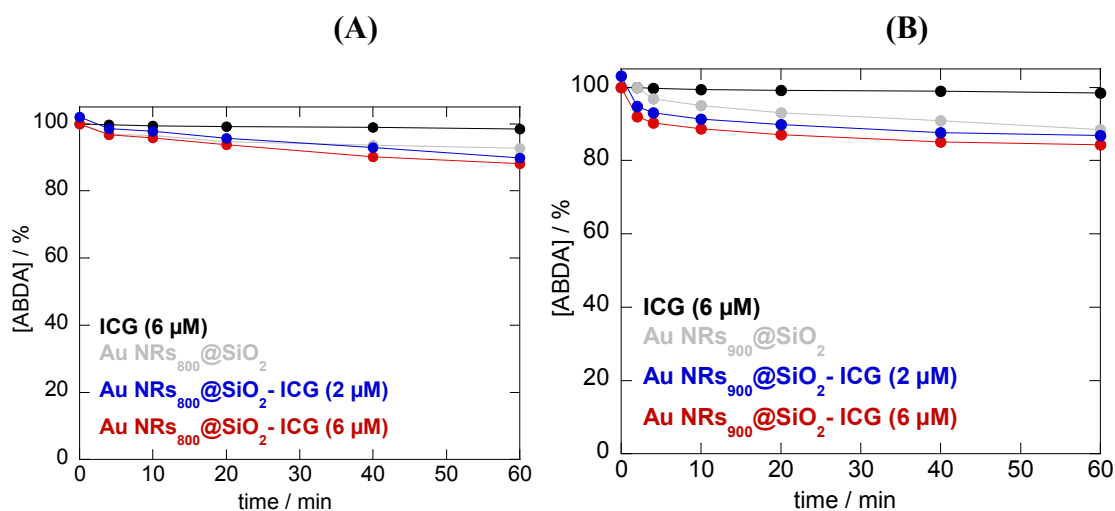

**Figure S1.** Photo-induced degradation of ABDA (10  $\mu\text{M}$ ) under irradiation at 810 nm (1 W  $\text{cm}^{-2}$ ) using a CW laser in the presence of (A) ICG (6  $\mu\text{M}$ ) in water +10 % DMSO (black), 300 pM Au NRs<sub>800</sub>@SiO<sub>2</sub> (grey), 300 pM Au NRs<sub>800</sub>@SiO<sub>2</sub>-ICG (2  $\mu\text{M}$ ) (blue) and 300 pM Au NRs<sub>800</sub>@SiO<sub>2</sub>-ICG (6  $\mu\text{M}$ ) (red); (B) ICG (6  $\mu\text{M}$ ) in water +10 % DMSO (black), 300 pM Au NRs<sub>900</sub>@SiO<sub>2</sub> (grey), 300 pM Au NRs<sub>900</sub>@SiO<sub>2</sub>-ICG (2  $\mu\text{M}$ ) (blue) and Au 300 pM NRs<sub>900</sub>@SiO<sub>2</sub>-ICG (6  $\mu\text{M}$ ) (red).

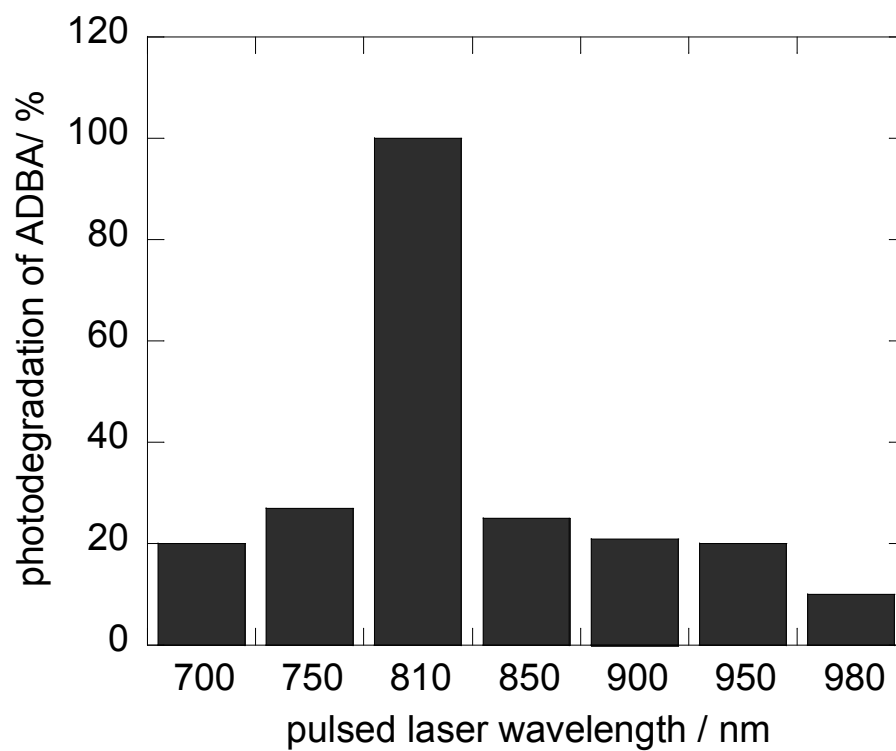

**Figure S2:** Photo-induced degradation of ABDA (10  $\mu\text{M}$ ) using pulsed laser irradiation (1  $\text{W cm}^{-2}$ ) at different wavelength in the presence of 300 pM Au NRs<sub>900</sub>@SiO<sub>2</sub>-ICG (6  $\mu\text{M}$ ).

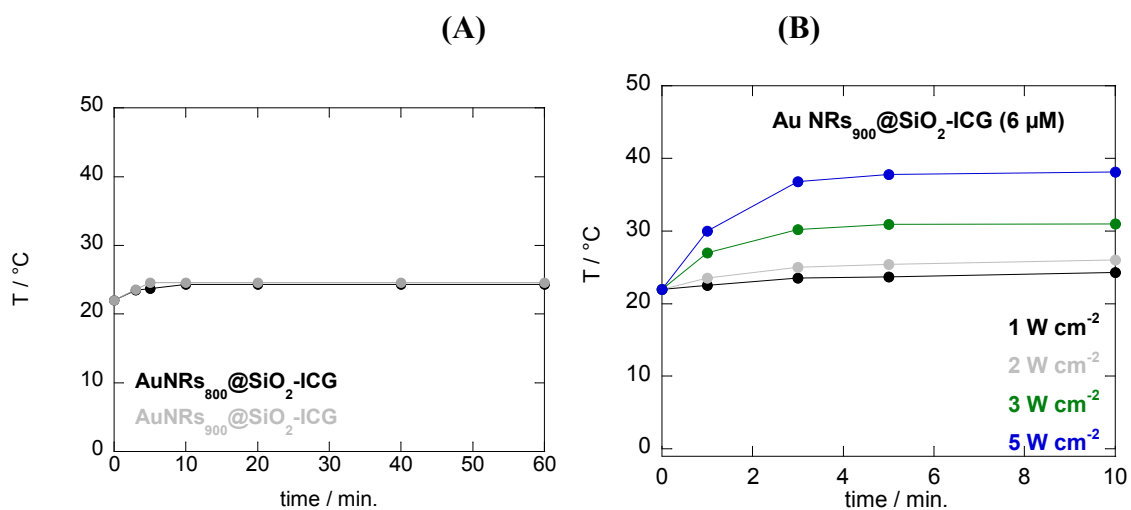

**Figure S3 :** Photothermal effect upon pulsed laser irradiation of nanostructures at 810 nm: (A) 300 pM Au NR<sub>800</sub>@SiO<sub>2</sub>-ICG (6 μM) (black) and 300 pM Au NR<sub>900</sub>@SiO<sub>2</sub>-ICG (6 μM) at 1 W cm<sup>-1</sup>; (B) 300 pM Au NR<sub>900</sub>@SiO<sub>2</sub>-ICG (6 μM) at 1 W cm<sup>-1</sup> (black), 2 W cm<sup>-1</sup> (grey), 3 W cm<sup>-1</sup> (green), 5 W cm<sup>-1</sup> (blue).

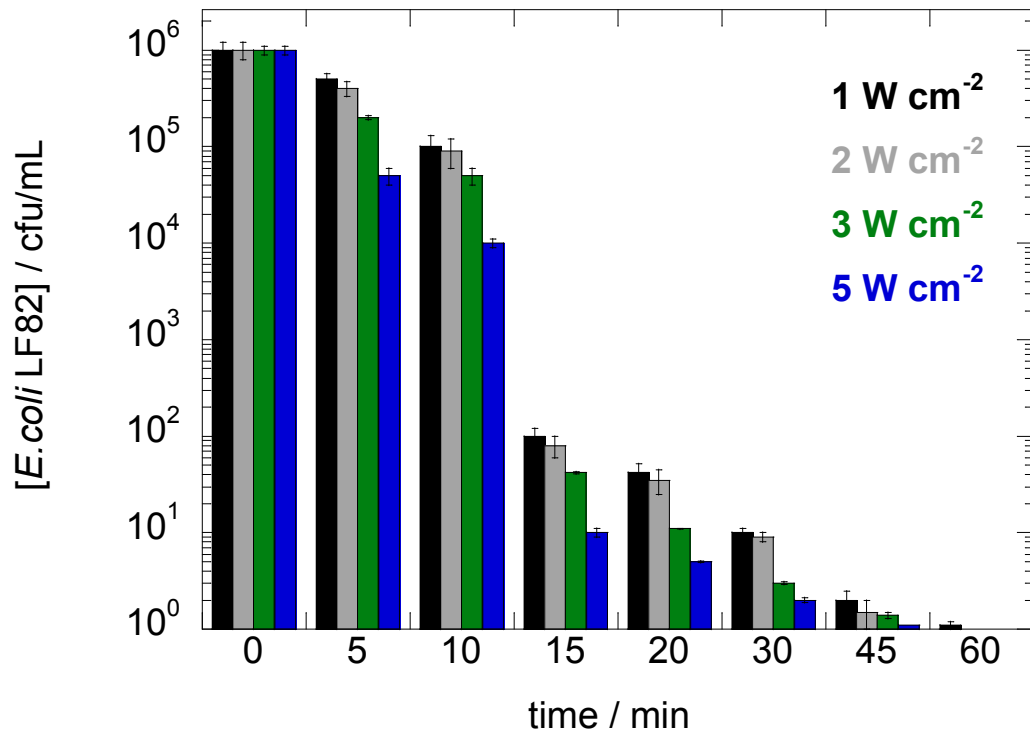

**Figure S4:** Ablation of *E. coli* LF82 in the presence of 300 pM AuNRs<sub>900</sub>@SiO<sub>2</sub>-ICG (6 μM) at 810 nm for different time intervals and laser powers: 1 W cm<sup>-1</sup> (black), 2 W cm<sup>-1</sup> (grey), 3 W cm<sup>-1</sup> (green), 5 W cm<sup>-1</sup> (blue).
